# Supplementary material
Source: Springer Nature journal article supplement (https://www.springermedizin.de/resource/supplementary/12903_2014_409_MOESM1_ESM.pdf/9516976)

C

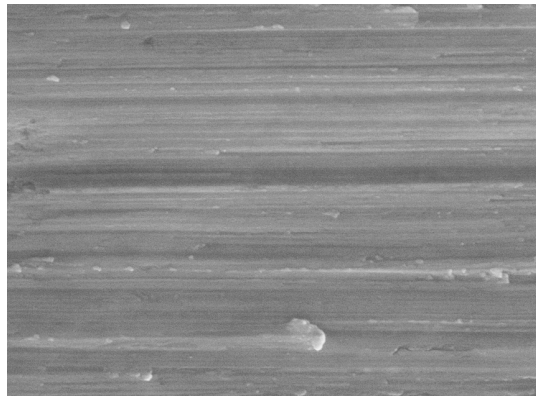

N1

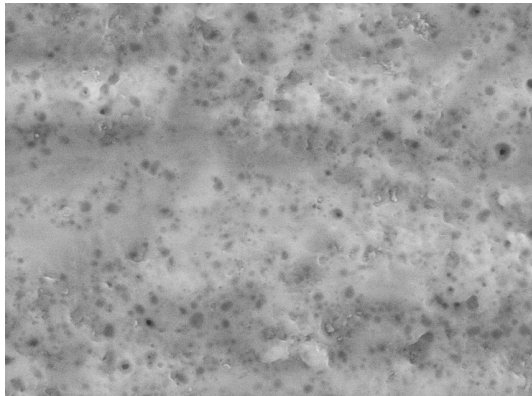

N2

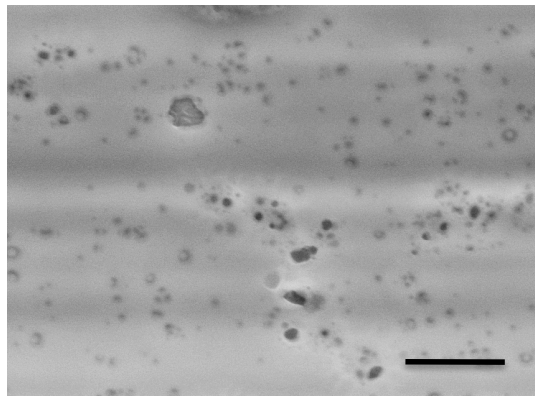

Supplement: MOESM1 [file 9516976]
